# Supplementary material for: Identification of key genes regulating brown adipose tissue thermogenesis in goat kids (Capra hircus) by using weighted gene co-expression network analysis
Source: Front Vet Sci. 2025 May 14;12:1525437. doi: 10.3389/fvets.2025.1525437 (PMC12116553; doi:10.3389/fvets.2025.1525437)
Supplement: SUPPLEMENTARY TABLE S2 — Information of co-differentially expressed genes belonging to the turquoise module. [file Table_2.XLSX]

## Sheet: Sheet1
Supplementary Table 2. Information of co-differentially expressed genes belonging to the turquoise module
Gene ID	Symbol	Description
ENSCHIG00000000241	PPIF	peptidylprolyl isomerase F [Source:NCBI gene;Acc:102187374]
ENSCHIG00000000785	COQ6	coenzyme Q6, monooxygenase [Source:NCBI gene;Acc:102187685]
ENSCHIG00000001561	AEN	apoptosis enhancing nuclease [Source:NCBI gene;Acc:102185955]
ENSCHIG00000001878	TEX264	testis expressed 264 [Source:NCBI gene;Acc:102190467]
ENSCHIG00000002460	USP2	ubiquitin specific peptidase 2 [Source:NCBI gene;Acc:102176627]
ENSCHIG00000003131	TIMM50	translocase of inner mitochondrial membrane 50 [Source:NCBI gene;Acc:102184935]
ENSCHIG00000003148	ALAS1	5'-aminolevulinate synthase 1 [Source:NCBI gene;Acc:100861387]
ENSCHIG00000003808	IDH2	isocitrate dehydrogenase (NADP(+)) 2, mitochondrial [Source:NCBI gene;Acc:102168943]
ENSCHIG00000004311	SEC14L6	putative SEC14-like protein 6 [Source:NCBI gene;Acc:102190250]
ENSCHIG00000005534	HOXA5	homeobox A5 [Source:NCBI gene;Acc:106502032]
ENSCHIG00000006455	RILPL2	Rab interacting lysosomal protein like 2 [Source:NCBI gene;Acc:102183090]
ENSCHIG00000006555	RNF169	ring finger protein 169 [Source:NCBI gene;Acc:102169890]
ENSCHIG00000006876	OGDH	oxoglutarate dehydrogenase [Source:NCBI gene;Acc:102183291]
ENSCHIG00000007140	NIT1	nitrilase 1 [Source:NCBI gene;Acc:102170101]
ENSCHIG00000007515	ZNF672	zinc finger protein 672 [Source:NCBI gene;Acc:102190783]
ENSCHIG00000007574	ATP5IF1	ATP synthase inhibitory factor subunit 1 [Source:NCBI gene;Acc:102175910]
ENSCHIG00000007877	ACO2	aconitase 2 [Source:NCBI gene;Acc:102190495]
ENSCHIG00000007892	DUSP14	dual specificity phosphatase 14 [Source:NCBI gene;Acc:102177921]
ENSCHIG00000008689	DCTPP1	dCTP pyrophosphatase 1 [Source:NCBI gene;Acc:102171294]
ENSCHIG00000008705	ELL2	elongation factor for RNA polymerase II 2 [Source:NCBI gene;Acc:102183511]
ENSCHIG00000009133	MLYCD	malonyl-CoA decarboxylase [Source:NCBI gene;Acc:102183446]
ENSCHIG00000009187	-	NADH:ubiquinone oxidoreductase subunit A7 [Source:NCBI gene;Acc:102176032]
ENSCHIG00000009231	MPEG1	macrophage-expressed gene 1 protein [Source:NCBI gene;Acc:102177263]
ENSCHIG00000009282	BCS1L	mitochondrial chaperone BCS1 [Source:NCBI gene;Acc:102169634]
ENSCHIG00000009453	-	HIG1 hypoxia inducible domain family member 2A [Source:NCBI gene;Acc:102180756]
ENSCHIG00000009483	-	TEN1, CST complex subunit [Source:NCBI gene;Acc:102189990]
ENSCHIG00000010182	ADORA1	adenosine A1 receptor [Source:NCBI gene;Acc:102181801]
ENSCHIG00000010416	OSBPL8	oxysterol binding protein like 8 [Source:NCBI gene;Acc:102185062]
ENSCHIG00000010454	KLHDC7A	kelch domain containing 7A [Source:NCBI gene;Acc:102172499]
ENSCHIG00000010626	TBL1XR1	transducin beta like 1 X-linked receptor 1 [Source:NCBI gene;Acc:102170182]
ENSCHIG00000010686	STAP2	signal transducing adaptor family member 2 [Source:NCBI gene;Acc:102172056]
ENSCHIG00000010886	TMEM238	transmembrane protein 238 [Source:NCBI gene;Acc:108638048]
ENSCHIG00000010994	METTL17	methyltransferase like 17 [Source:NCBI gene;Acc:102172723]
ENSCHIG00000011037	UCP1	uncoupling protein 1 [Source:NCBI gene;Acc:102190982]
ENSCHIG00000011255	PYGM	glycogen phosphorylase, muscle associated [Source:NCBI gene;Acc:102183771]
ENSCHIG00000011407	MRPL41	mitochondrial ribosomal protein L41 [Source:NCBI gene;Acc:102188871]
ENSCHIG00000011590	ANXA3	annexin A3 [Source:NCBI gene;Acc:102169468]
ENSCHIG00000012333	HSD17B4	hydroxysteroid 17-beta dehydrogenase 4 [Source:NCBI gene;Acc:102172142]
ENSCHIG00000012712	MRPL16	mitochondrial ribosomal protein L16 [Source:NCBI gene;Acc:102170167]
ENSCHIG00000012814	HLF	HLF, PAR bZIP transcription factor [Source:NCBI gene;Acc:102180343]
ENSCHIG00000013201	HLA-DRA	HLA class II histocompatibility antigen, DR alpha chain [Source:NCBI gene;Acc:102189356]
ENSCHIG00000013261	GOT2	glutamic-oxaloacetic transaminase 2 [Source:NCBI gene;Acc:102168850]
ENSCHIG00000013266	NOS3	nitric oxide synthase 3 [Source:NCBI gene;Acc:102185338]
ENSCHIG00000013347	PEX19	peroxisomal biogenesis factor 19 [Source:NCBI gene;Acc:102184210]
ENSCHIG00000013480	NDUFB7	NADH:ubiquinone oxidoreductase subunit B7 [Source:NCBI gene;Acc:102171860]
ENSCHIG00000013533	TRIM44	tripartite motif containing 44 [Source:NCBI gene;Acc:102182988]
ENSCHIG00000013607	LBR	lamin B receptor [Source:NCBI gene;Acc:102187420]
ENSCHIG00000013801	NDUFA6	NADH:ubiquinone oxidoreductase subunit A6 [Source:NCBI gene;Acc:102171224]
ENSCHIG00000013949	THOP1	thimet oligopeptidase 1 [Source:NCBI gene;Acc:102178165]
ENSCHIG00000014038	NDUFB4	NADH:ubiquinone oxidoreductase subunit B4 [Source:NCBI gene;Acc:102177927]
ENSCHIG00000014366	SETBP1	SET binding protein 1 [Source:NCBI gene;Acc:102180714]
ENSCHIG00000014430	AKAP13	A-kinase anchoring protein 13 [Source:NCBI gene;Acc:102184845]
ENSCHIG00000014509	FAM126A	family with sequence similarity 126 member A [Source:NCBI gene;Acc:102171125]
ENSCHIG00000014711	DNPH1	2'-deoxynucleoside 5'-phosphate N-hydrolase 1 [Source:NCBI gene;Acc:102177764]
ENSCHIG00000014925	COX7A1	cytochrome c oxidase subunit 7A1, mitochondrial [Source:NCBI gene;Acc:102175610]
ENSCHIG00000015073	-	eukaryotic elongation factor 2 lysine methyltransferase [Source:NCBI gene;Acc:102169724]
ENSCHIG00000015391	FAM129A	family with sequence similarity 129 member A [Source:NCBI gene;Acc:102187885]
ENSCHIG00000015525	-	malate dehydrogenase 1 [Source:NCBI gene;Acc:102176699]
ENSCHIG00000015786	-	NADH:ubiquinone oxidoreductase subunit B1 [Source:NCBI gene;Acc:102189802]
ENSCHIG00000015898	ALPK3	alpha kinase 3 [Source:NCBI gene;Acc:102188535]
ENSCHIG00000015999	-	enolase 1 [Source:NCBI gene;Acc:102175881]
ENSCHIG00000016010	-	cytochrome c oxidase subunit 7A2, mitochondrial [Source:NCBI gene;Acc:102188675]
ENSCHIG00000016047	CRAT	carnitine O-acetyltransferase [Source:NCBI gene;Acc:102170433]
ENSCHIG00000016164	-	NADH:ubiquinone oxidoreductase subunit C1 [Source:NCBI gene;Acc:102186141]
ENSCHIG00000016221	RNF38	ring finger protein 38 [Source:NCBI gene;Acc:102185654]
ENSCHIG00000016346	TRABD2B	TraB domain containing 2B [Source:NCBI gene;Acc:102191200]
ENSCHIG00000016584	MCAT	malonyl-CoA-acyl carrier protein transacylase [Source:NCBI gene;Acc:102191221]
ENSCHIG00000016675	-	-
ENSCHIG00000016857	COQ9	coenzyme Q9 [Source:NCBI gene;Acc:102189983]
ENSCHIG00000016968	MRPL28	mitochondrial ribosomal protein L28 [Source:NCBI gene;Acc:102170654]
ENSCHIG00000017074	TRMU	tRNA 5-methylaminomethyl-2-thiouridylate methyltransferase [Source:NCBI gene;Acc:102178891]
ENSCHIG00000017163	PANK1	pantothenate kinase 1 [Source:NCBI gene;Acc:102170661]
ENSCHIG00000017170	MCRIP2	MAPK regulated corepressor interacting protein 2 [Source:NCBI gene;Acc:100861059]
ENSCHIG00000017221	TMEM266	transmembrane protein 266 [Source:NCBI gene;Acc:102188804]
ENSCHIG00000017330	GYG1	glycogenin 1 [Source:NCBI gene;Acc:102184201]
ENSCHIG00000017449	ACOT8	acyl-CoA thioesterase 8 [Source:NCBI gene;Acc:102180774]
ENSCHIG00000017488	UQCRQ	cytochrome b-c1 complex subunit 8 [Source:NCBI gene;Acc:102171149]
ENSCHIG00000017517	CYC1	cytochrome c1, heme protein, mitochondrial [Source:NCBI gene;Acc:102169976]
ENSCHIG00000017804	-	C-type lectin domain family 2 member E [Source:NCBI gene;Acc:102184901]
ENSCHIG00000017809	FBXL15	F-box and leucine rich repeat protein 15 [Source:NCBI gene;Acc:102181185]
ENSCHIG00000017986	-	thioredoxin 2 [Source:NCBI gene;Acc:102173536]
ENSCHIG00000018203	ENPP2	ectonucleotide pyrophosphatase/phosphodiesterase 2 [Source:NCBI gene;Acc:102176626]
ENSCHIG00000018383	RND2	Rho family GTPase 2 [Source:NCBI gene;Acc:102185394]
ENSCHIG00000018477	CHCHD4	coiled-coil-helix-coiled-coil-helix domain containing 4 [Source:NCBI gene;Acc:102191090]
ENSCHIG00000018535	RHBG	Rh family B glycoprotein [Source:NCBI gene;Acc:102176282]
ENSCHIG00000018724	-	-
ENSCHIG00000018896	CFD	complement factor D [Source:NCBI gene;Acc:102173560]
ENSCHIG00000019147	-	dynein light chain LC8-type 1 [Source:NCBI gene;Acc:102172925]
ENSCHIG00000019595	C6orf136	chromosome 6 open reading frame 136 [Source:HGNC Symbol;Acc:HGNC:21301]
ENSCHIG00000019736	LBP	lipopolysaccharide binding protein [Source:NCBI gene;Acc:102186029]
ENSCHIG00000020162	PPTC7	PTC7 protein phosphatase homolog [Source:NCBI gene;Acc:102180788]
ENSCHIG00000020466	-	transmembrane protein 223 [Source:NCBI gene;Acc:102173641]
ENSCHIG00000020489	SERINC3	serine incorporator 3 [Source:NCBI gene;Acc:102171350]
ENSCHIG00000020583	TUFM	Tu translation elongation factor, mitochondrial [Source:NCBI gene;Acc:102188278]
ENSCHIG00000020746	CHMP4A	charged multivesicular body protein 4A [Source:NCBI gene;Acc:102189213]
ENSCHIG00000020781	ENDOG	endonuclease G [Source:NCBI gene;Acc:102191713]
ENSCHIG00000020812	C12orf57	chromosome 5 C12orf57 homolog [Source:NCBI gene;Acc:102190592]
ENSCHIG00000020916	NME3	NME/NM23 nucleoside diphosphate kinase 3 [Source:NCBI gene;Acc:102190038]
ENSCHIG00000020923	ANXA1	annexin A1 [Source:NCBI gene;Acc:102172262]
ENSCHIG00000021213	-	NADH:ubiquinone oxidoreductase subunit A11 [Source:NCBI gene;Acc:102181026]
ENSCHIG00000021378	CHCHD10	coiled-coil-helix-coiled-coil-helix domain containing 10 [Source:HGNC Symbol;Acc:HGNC:15559]
ENSCHIG00000021532	STARD13	StAR related lipid transfer domain containing 13 [Source:NCBI gene;Acc:102180134]
ENSCHIG00000021893	HCN2	hyperpolarization activated cyclic nucleotide gated potassium and sodium channel 2 [Source:NCBI gene;Acc:102171060]
ENSCHIG00000022228	COPB2	coatomer protein complex subunit beta 2 [Source:NCBI gene;Acc:102184200]
ENSCHIG00000022248	PDCD4	programmed cell death 4 [Source:NCBI gene;Acc:100861341]
ENSCHIG00000022280	NDUFAF8	NADH:ubiquinone oxidoreductase complex assembly factor 8 [Source:NCBI gene;Acc:108638191]
ENSCHIG00000022358	SDE2	SDE2 telomere maintenance homolog [Source:NCBI gene;Acc:102189229]
ENSCHIG00000022516	-	glyceraldehyde-3-phosphate dehydrogenase [Source:NCBI gene;Acc:100860872]
ENSCHIG00000022535	TMEM8A	transmembrane protein 8A [Source:NCBI gene;Acc:102170930]
ENSCHIG00000022872	TMEM147	transmembrane protein 147 [Source:NCBI gene;Acc:102181068]
ENSCHIG00000022888	NDUFV1	NADH:ubiquinone oxidoreductase core subunit V1 [Source:NCBI gene;Acc:102184322]
ENSCHIG00000023112	COX6B1	cytochrome c oxidase subunit 6B1 [Source:NCBI gene;Acc:102179036]
ENSCHIG00000023338	-	hemoglobin fetal subunit beta-like [Source:NCBI gene;Acc:102176710]
ENSCHIG00000023350	MICOS10	mitochondrial contact site and cristae organizing system subunit 10 [Source:NCBI gene;Acc:102169146]
ENSCHIG00000023373	-	ATP synthase F1 subunit epsilon [Source:NCBI gene;Acc:102188061]
ENSCHIG00000023479	C1R	complement C1r [Source:NCBI gene;Acc:102188835]
ENSCHIG00000023587	ITGA7	integrin subunit alpha 7 [Source:NCBI gene;Acc:102169839]
ENSCHIG00000023810	GALR3	galanin receptor 3 [Source:NCBI gene;Acc:106502151]
ENSCHIG00000024287	MDH2	malate dehydrogenase 2 [Source:NCBI gene;Acc:102174799]
ENSCHIG00000024484	SSPN	sarcospan [Source:NCBI gene;Acc:102171222]
ENSCHIG00000024557	PPP5C	protein phosphatase 5 catalytic subunit [Source:NCBI gene;Acc:102174965]
ENSCHIG00000024878	ANKRD9	ankyrin repeat domain 9 [Source:NCBI gene;Acc:108638503]
ENSCHIG00000024940	MRPS27	mitochondrial ribosomal protein S27 [Source:NCBI gene;Acc:102175803]
ENSCHIG00000024949	GOLIM4	golgi integral membrane protein 4 [Source:NCBI gene;Acc:102184557]
ENSCHIG00000025025	-	phytanoyl-CoA dioxygenase domain containing 1 [Source:NCBI gene;Acc:102181788]
ENSCHIG00000025033	IQSEC1	IQ motif and Sec7 domain 1 [Source:NCBI gene;Acc:102172773]
ENSCHIG00000025054	-	mitochondrial contact site and cristae organizing system subunit 13 [Source:NCBI gene;Acc:102183141]
ENSCHIG00000025071	RRAS	RAS related [Source:NCBI gene;Acc:102184366]
ENSCHIG00000025193	MYO19	myosin XIX [Source:NCBI gene;Acc:102168292]
ENSCHIG00000025416	COG5	component of oligomeric golgi complex 5 [Source:NCBI gene;Acc:102174622]
ENSCHIG00000025654	HMGCS2	3-hydroxy-3-methylglutaryl-CoA synthase 2 [Source:NCBI gene;Acc:100860890]
ENSCHIG00000025758	MPV17L2	MPV17 mitochondrial inner membrane protein like 2 [Source:NCBI gene;Acc:102169854]
ENSCHIG00000025853	-	cytochrome c [Source:NCBI gene;Acc:102173997]
ENSCHIG00000025888	DDHD1	DDHD domain containing 1 [Source:NCBI gene;Acc:102187228]
ENSCHIG00000025996	-	NADH:ubiquinone oxidoreductase subunit V3 [Source:NCBI gene;Acc:102183643]
ENSCHIG00000026043	GSS	glutathione synthetase [Source:NCBI gene;Acc:102170247]
ENSCHIG00000026106	-	cytochrome c oxidase subunit 6A1, mitochondrial [Source:NCBI gene;Acc:102172376]
ENSCHIG00000026114	DDX6	DEAD-box helicase 6 [Source:NCBI gene;Acc:102170071]
ENSCHIG00000026146	TFF2	trefoil factor 2 [Source:NCBI gene;Acc:102182174]
ENSCHIG00000026236	GRPEL1	GrpE like 1, mitochondrial [Source:NCBI gene;Acc:102174922]
ENSCHIG00000026293	-	cytochrome b-c1 complex subunit 9 [Source:NCBI gene;Acc:102187154]
ENSCHIG00000026338	IMMT	inner membrane mitochondrial protein [Source:NCBI gene;Acc:102189135]
ENSCHIG00000026370	BDH1	3-hydroxybutyrate dehydrogenase 1 [Source:NCBI gene;Acc:102180798]
ENSCHIG00000026538	MRPL54	mitochondrial ribosomal protein L54 [Source:NCBI gene;Acc:102177154]
ENSCHIG00000026556	DPH7	diphthamide biosynthesis 7 [Source:NCBI gene;Acc:102189967]
ENSCHIG00000026730	KCNK3	potassium two pore domain channel subfamily K member 3 [Source:NCBI gene;Acc:106502632]
ENSCHIG00000026833	PTGES2	prostaglandin E synthase 2 [Source:NCBI gene;Acc:102172909]
ENSCHIG00000027095	GPT2	glutamic--pyruvic transaminase 2 [Source:NCBI gene;Acc:102173681]
ENSCHIG00000027210	MRPL12	mitochondrial ribosomal protein L12 [Source:NCBI gene;Acc:102170909]
MSTRG.14415	--	PREDICTED: CXADR-like membrane protein isoform X1 [Capra hircus]
MSTRG.15467	Pol	endonuclease-reverse transcriptase [Babesia ovata]
MSTRG.18694	--	endonuclease-reverse transcriptase [Babesia ovata]
MSTRG.9227	Mrpl36	TPA: mitochondrial ribosomal protein L36 [Bos taurus]
